# Supplementary material for: British Antarctic Survey’s Aerogeophysical Data: Releasing 25 Years of Airborne Gravity, Magnetic, and Radar Datasets over Antarctica
Source: Copernicus journal article supplement (doi:10.5194/essd-2022-49), 2022-02-18
Supplement: Supplementary file 1 [file essd-2022-49-supplement.pdf]

## 6. Supplement

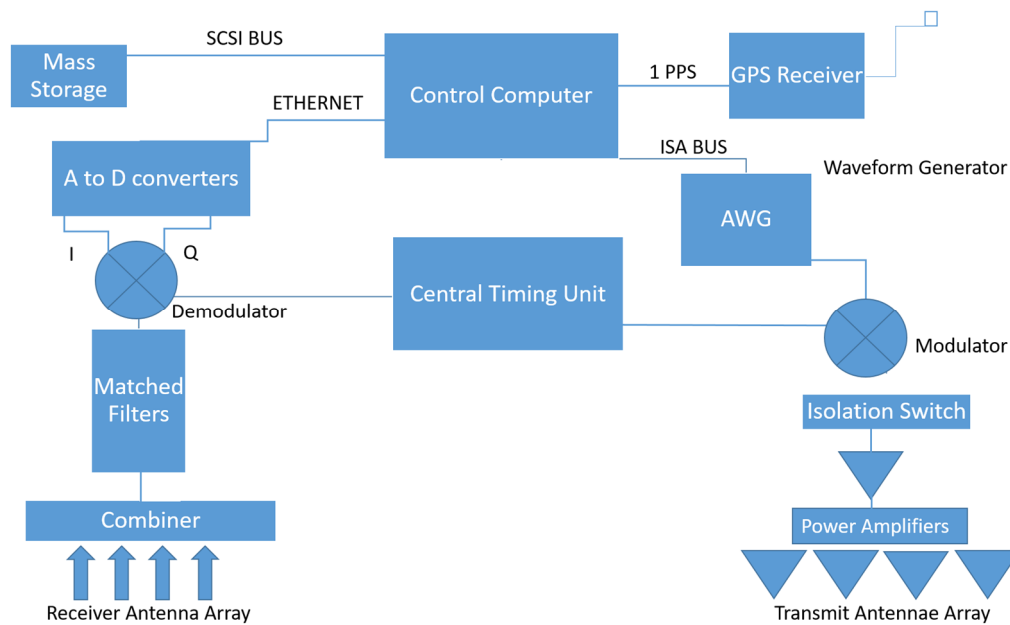

Figure S1. Digitised version of the diagram describing the set-up for the “BAS-built” radar system (Corr and Popple, 1994).

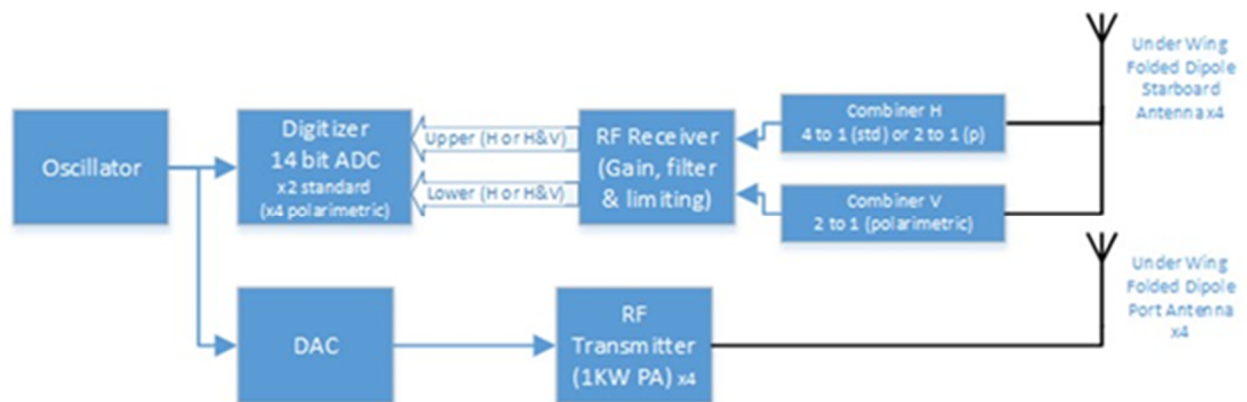

Figure S2. Diagram describing the set-up for the PASIN-1 radar system.

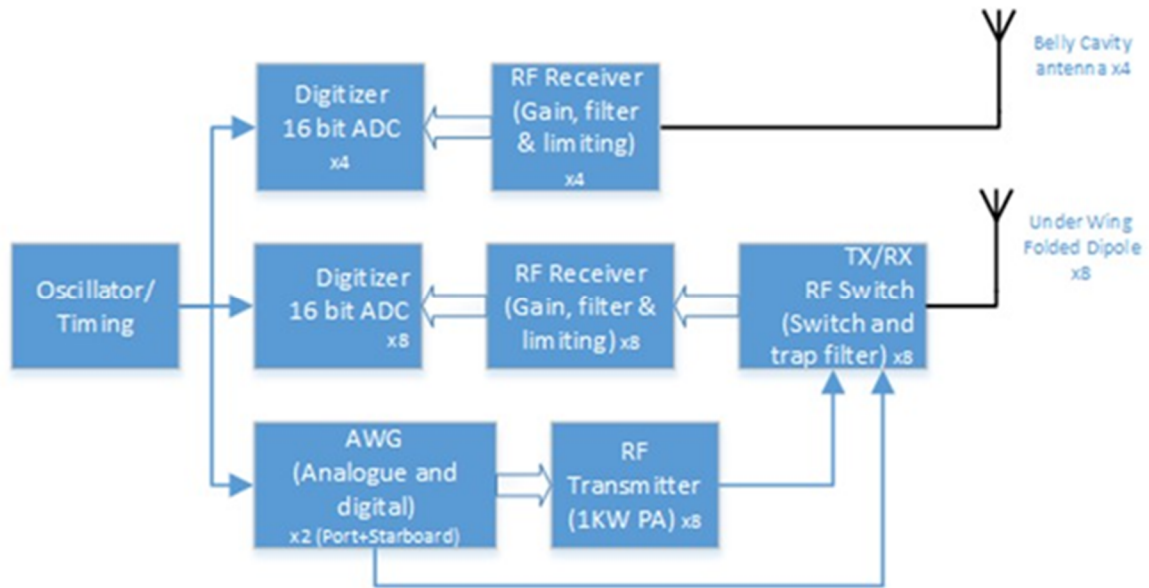

Figure S3. Diagram describing the set-up for the PASIN-2 radar system.

**Table S1: PASIN-2 Radar Transmit (Tx) and Receive (Rx) Description.** “\*” indicates Tukey-weighted.

| Waveform type (frame uS*) | Port                                                                    | Starboard                                                               |
|---------------------------|-------------------------------------------------------------------------|-------------------------------------------------------------------------|
| 1. 0 to 64uS              | Tx 4uS chirp*, Rx for remaining frame                                   | Rx full frame                                                           |
| 2. 64uS to 128uS          | Rx full frame                                                           | Tx 4uS chirp*, Rx for remaining frame                                   |
| 3. 128uS to 192uS         | Tx 4uS chirp* 180° out of phase with waveform 1, Rx for remaining frame | Rx full frame                                                           |
| 4. 192uS to 256 uS        | Rx full frame                                                           | Tx 4uS chirp* 180° out of phase with waveform 2, Rx for remaining frame |
| 5. 256uS to 320 uS        | Tx 1uS chirp* (15dB down), Rx for remaining frame                       | Rx full frame                                                           |
